# Supplementary material for: Quantitative Risk Assessment for the Introduction of Bovine Leukemia Virus-Infected Cattle Using a Cattle Movement Network Analysis
Source: Pathogens. 2020 Oct 28;9(11):903. doi: 10.3390/pathogens9110903 (PMC7693104; doi:10.3390/pathogens9110903)
Supplement: Supplementary file 1 [file pathogens-09-00903-s001.zip › Supplementary dataset.xlsx]

## Sheet: Sheet1
Sample ID #	Place	Slaughterhouse	Slaughtering date	ELISA S/P	Sex	Age (Months old)	Breed	Carcass weight (kg)		・"Place" indicates a prefecture where the cattle was born.
1	Miyazaki	A	2015.12.01	0	Female	106	Japanese black	394		・"Slaghtering date" indicates slaughtering and sampling date.
2	Miyazaki	A	2015.12.01	0.02	Female	165	Japanese black	328.5		・ELISA S/P ratio was calculated by dividing OD450 of samples with it of positive control. More than 0.3 was diagnosed as BLV antibody-positive.
3	Miyazaki	A	2015.12.01	0.01	Female	209	Japanese black	281		・Yellow highlighted row indicates ELISA-positive.
4	Miyazaki	A	2015.12.01	0.03	Female	208	Japanese black	308.5		・"No info." indicates missing data.
5	Miyazaki	A	2015.12.01	0.01	Female	198	Japanese black	221.5
6	Miyazaki	A	2015.12.01	0.01	Female	164	Japanese black	263
7	Miyazaki	A	2015.12.01	0.01	Female	147	Japanese black	379
8	Miyazaki	A	2015.12.03	0.02	Female	29	Japanese black	435
9	Miyazaki	A	2015.12.03	0.01	Female	29	Japanese black	429
10	Miyazaki	A	2015.12.03	0.02	Female	29	Japanese black	371
11	Miyazaki	A	2015.12.03	0.01	Female	30	Japanese black	403.5
12	Miyazaki	A	2015.12.03	1.41	Female	30	Japanese black	406
13	Nagasaki	A	2016.01.03	0.05	Female	111	Japanese black	365
14	Miyazaki	A	2016.01.03	-0.03	Female	138	Japanese black	309.5
15	Miyazaki	A	2016.01.03	2.55	Female	186	Japanese black	329.5
16	Miyazaki	A	2016.01.03	0.04	Female	145	Japanese black	318
17	Kumamoto	A	2016.01.04	2.46	Female	90	Japanese black	330
18	Okayama	A	2016.01.04	0	Female	95	Japanese black	328.5
19	Kagoshima	A	2016.01.04	0.02	Female	169	Japanese black	262.5
20	Miyazaki	A	2016.01.04	0.03	Female	139	Japanese black	366
21	Miyazaki	A	2016.01.04	0	Female	151	Japanese black	355.5
22	Miyazaki	A	2016.01.04	2.42	Female	173	Japanese black	324.5
23	Miyazaki	A	2016.01.12	0.02	Female	53	Japanese black	No Info.
24	Kumamoto	A	2016.01.12	2.49	Female	136	Japanese black	No Info.
25	Kumamoto	A	2016.01.12	2.65	Female	51	Japanese black	No Info.
26	Kagoshima	A	2016.01.12	2.34	Female	51	Japanese black	No Info.
27	Miyazaki	A	2016.01.12	-0.01	Female	61	Japanese black	No Info.
28	Miyazaki	A	2016.01.11	0.06	Female	152	Japanese black	450
29	Miyazaki	A	2016.01.11	2.43	Female	196	Japanese black	374.5
30	Kagoshima	A	2016.01.11	0	Female	152	Japanese black	363
31	Saga	A	2016.01.11	2.42	Female	142	Japanese black	366.5
32	Kagoshima	A	2016.01.11	0.02	Female	136	Japanese black	271.5
33	Kagoshima	A	2016.01.11	0	Female	193	Japanese black	291.5
34	Kagoshima	A	2016.01.11	0.01	Female	177	Japanese black	313
35	Kagoshima	A	2016.01.11	0.02	Female	136	Japanese black	371
36	Kagoshima	A	2016.01.11	0.01	Female	160	Japanese black	269
37	Oita	A	2016.01.12	0.06	Female	82	Japanese black	370.5
38	Miyazaki	A	2016.01.12	0.02	Female	87	Japanese black	393.5
39	Miyazaki	A	2016.01.12	-0.06	Female	159	Japanese black	359
40	Miyazaki	A	2016.01.12	-0.09	Female	156	Japanese black	340.5
41	Miyazaki	A	2016.01.12	-0.03	Female	174	Japanese black	317
42	Kumamoto	A	2016.01.12	2.34	Female	127	Japanese black	245.5
43	Miyazaki	A	2016.01.17	0.04	Female	54	Japanese black	371
44	Nagasaki	A	2016.01.17	0.03	Female	162	Japanese black	370
45	Kumamoto	A	2016.01.17	1.83	Female	198	Japanese black	292.5
46	Kagoshima	A	2016.01.17	1.86	Female	178	Japanese black	307.5
47	Miyazaki	A	2016.01.18	0.03	Female	91	Japanese black	389.5
48	Kagoshima	A	2016.01.18	0.01	Female	161	Japanese black	366.5
49	Iwate	A	2016.01.18	1.64	Female	146	Japanese black	319.5
50	Miyazaki	A	2016.01.18	0.03	Female	158	Japanese black	282.5
51	Miyazaki	A	2016.01.18	0.01	Female	189	Japanese black	332.5
52	Miyazaki	A	2016.01.18	0.02	Female	170	Japanese black	313
53	Miyazaki	A	2016.01.25	1.86	Female	127	Japanese black	324
54	Miyazaki	A	2016.01.25	1.79	Female	142	Japanese black	284
55	Miyazaki	A	2016.01.25	0	Female	156	Japanese black	312.5
56	Miyazaki	A	2016.01.25	-0.01	Female	122	Japanese black	346
57	Nagasaki	A	2016.01.25	0.01	Female	145	Japanese black	329.5
58	Miyazaki	A	2016.01.25	0.02	Female	139	Japanese black	376
59	Kagoshima	A	2016.01.25	1.72	Female	81	Holstein	291.5
60	Yamanashi	A	2016.01.26	0.01	Male	21	F1	405
61	Hokkaido	A	2016.01.26	0	Female	25	F1	516
62	Hokkaido	A	2016.01.26	0.03	Female	25	F1	602
63	Hokkaido	A	2016.01.26	0.04	Female	26	F1	442
64	Hokkaido	A	2016.01.26	0.05	Female	26	F1	485
65	Miyazaki	A	2016.01.26	0.01	Female	144	Japanese black	443
66	Kagoshima	A	2016.01.26	0.05	Female	187	Japanese black	388.5
67	Kagoshima	A	2016.01.26	1.73	Female	186	Japanese black	379.5
68	Miyazaki	A	2016.01.26	0.01	Female	109	Japanese black	314.5
69	Miyazaki	A	2016.01.26	1.84	Female	108	Japanese black	374.5
70	Nagasaki	A	2016.01.26	0.02	Female	188	Japanese black	393
71	Miyazaki	A	2016.01.26	1.74	Female	202	Japanese black	278
72	Miyazaki	A	2016.01.26	0	Female	108	Holstein	272
73	Miyazaki	A	2016.01.26	0	Female	109	Holstein	269
74	Miyazaki	A	2016.01.26	0.02	Female	38	Japanese black	No Info.
75	Kagoshima	A	2016.02.01	0.02	Female	152	Japanese black	372.5
76	Kagoshima	A	2016.02.01	0.02	Female	81	Japanese black	437
77	Miyazaki	A	2016.02.01	0.01	Female	90	Japanese black	415.5
78	Miyazaki	A	2016.02.01	1.69	Female	169	Japanese black	263
79	Nagano	A	2016.02.01	0.27	Female	141	Japanese black	312
80	Oita	A	2016.02.01	1.48	Female	151	Japanese black	377.5
81	Miyazaki	A	2016.02.01	0.02	Female	133	Japanese black	336.5
82	Miyazaki	A	2016.02.01	0	Female	164	Japanese black	350
83	Miyazaki	A	2016.02.01	0.01	Female	133	Japanese black	300
84	Nagasaki	A	2016.02.07	0.01	Female	111	Japanese black	417.5
85	Kagoshima	A	2016.02.07	-0.05	Female	182	Japanese black	271.5
86	Miyazaki	A	2016.02.09	0.02	Female	59	Japanese black	No Info.
87	Kagoshima	A	2016.02.08	0.05	Female	190	Japanese black	250
88	Kagoshima	A	2016.02.08	0.07	Female	159	Japanese black	265.5
89	Kagoshima	A	2016.02.08	0.04	Female	168	Japanese black	243.5
90	Miyazaki	A	2016.02.08	0.02	Female	137	Japanese black	326
91	Kagoshima	A	2016.02.14	0.03	Female	110	Japanese black	313.5
92	Miyazaki	A	2016.02.14	0.01	Female	140	Japanese black	306
93	Nagasaki	A	2016.02.14	1.4	Female	203	Japanese black	323.5
94	Nagasaki	A	2016.02.14	0.01	Female	176	Japanese black	326.5
95	Miyazaki	A	2016.02.15	1.46	Female	200	Japanese black	292.5
96	Kagoshima	A	2016.02.15	0.01	Female	88	Japanese black	371
97	Tochigi	A	2016.02.15	3.13	Female	150	Japanese black	323.5
98	Kagoshima	A	2016.02.15	0.02	Female	127	Japanese black	331
99	Kumamoto	A	2016.02.15	3.36	Female	96	Holstein	210
100	Kagoshima	A	2016.02.21	0	Female	40	Holstein	217
101	Miyazaki	A	2016.02.21	3.58	Female	86	Japanese black	494
102	Kagoshima	A	2016.02.21	0.01	Female	116	Japanese black	322.5
103	Kagoshima	A	2016.02.21	0.04	Female	125	Japanese black	324.5
104	Kagoshima	A	2016.02.21	0.06	Female	115	Japanese black	379.5
105	Miyazaki	A	2016.02.21	0.03	Female	139	Japanese black	331.5
106	Kagoshima	A	2016.02.21	0.02	Female	169	Japanese black	285.5
107	Kagoshima	A	2016.02.21	0.04	Female	123	Japanese black	352.5
108	Miyazaki	A	2016.02.07	3.57	Male	26	F1	557.5
109	Okayama	A	2016.02.22	0.01	Male	19	F1	370
110	Miyazaki	A	2016.02.22	0.03	Male	29	Japanese black	458
111	Miyazaki	A	2016.02.22	0.03	Female	30	Japanese black	402.5
112	Kagoshima	A	2016.02.22	0.04	Female	194	Japanese black	382
113	Miyazaki	A	2016.02.22	3.39	Female	114	Japanese black	406.5
114	Kagoshima	A	2016.02.22	0.02	Female	78	Japanese black	483.5
115	Miyazaki	A	2016.02.22	3.36	Female	97	Japanese black	401.5
116	Miyazaki	A	2016.02.22	0.02	Female	168	Japanese black	326
117	Miyazaki	A	2016.02.22	0.06	Female	178	Japanese black	355.5
118	Gifu	A	2016.02.22	0.01	Female	163	Japanese black	272.5
119	Miyazaki	A	2016.02.22	0.01	Female	164	Japanese black	341.5
120	Miyazaki	A	2016.02.22	0.09	Female	141	Japanese black	326.5
121	Miyagi	A	2016.02.23	2.46	Female	46	Japanese black	No Info.
122	Kagoshima	A	2016.02.28	1.72	Female	122	Japanese black	359
123	Miyazaki	A	2016.02.28	1.57	Female	113	Japanese black	359
124	Kagoshima	A	2016.02.28	0.03	Female	162	Japanese black	341
125	Miyazaki	A	2016.02.29	1.68	Female	41	Holstein	271.5
126	Nagasaki	A	2016.02.29	0.04	Female	98	Japanese black	359.5
127	Miyazaki	A	2016.02.29	0.02	Female	116	Japanese black	334
128	Miyazaki	A	2016.02.29	0.03	Female	183	Japanese black	322.5
129	Miyazaki	A	2016.02.29	0.04	Female	161	Japanese black	303.5
130	Miyazaki	A	2016.02.29	0.04	Female	130	Japanese black	462.5
131	Kagoshima	A	2016.02.29	1.62	Female	171	Japanese black	277.5
132	Kagoshima	A	2016.02.29	1.64	Female	177	Japanese black	305.5
133	Kagoshima	A	2016.02.29	0.02	Female	145	Japanese black	507.5
134	Miyazaki	A	2016.02.29	1.66	Female	200	Japanese black	346
135	Hokkaido	A	2016.02.29	0	Female	76	Holstein	214
136	Miyazaki	A	2016.02.29	0.98	Female	77	Holstein	261
137	Miyazaki	A	2016.02.29	1.67	Female	65	Holstein	230.5
138	Miyazaki	A	2016.03.01	0.03	Female	31	Japanese black	No Info.
139	Miyazaki	A	2016.03.06	0.02	Female	115	Japanese black	334.5
140	Kagoshima	A	2016.03.06	1.63	Female	128	Japanese black	321
141	Miyazaki	A	2016.03.06	0.03	Female	119	Japanese black	337.5
142	Kagoshima	A	2016.03.06	0.02	Female	141	Japanese black	309.5
143	Miyazaki	A	2016.03.06	0.02	Female	151	Japanese black	337.5
144	Okayama	A	2016.03.07	1.68	Male	26	F1	500.5
145	Okayama	A	2016.03.07	1.69	Male	25	F1	442
146	Miyazaki	A	2016.03.08	0.03	Female	33	Japanese black	488
147	Kagoshima	A	2016.03.08	0.02	Female	47	Japanese black	463
148	Miyazaki	A	2016.03.07	0.02	Female	138	Japanese black	381
149	Miyazaki	A	2016.03.07	0.01	Female	85	Japanese black	362.5
150	Miyazaki	A	2016.03.07	0.02	Female	91	Japanese black	356.5
151	Miyazaki	A	2016.03.07	0.1	Female	158	Japanese black	301.5
152	Miyazaki	A	2016.03.08	0.21	Female	162	Japanese black	377
153	Kagoshima	A	2016.03.07	5.01	Female	159	Japanese black	339
154	Kagoshima	A	2016.03.07	0.04	Female	139	Japanese black	318
155	Kagoshima	A	2016.03.07	0.34	Female	201	Japanese black	236.5
156	Kagoshima	A	2016.03.07	5.15	Female	127	Japanese black	351
157	Miyazaki	A	2016.03.08	0.04	Female	49	Japanese black	No Info.
158	Miyazaki	A	2016.03.13	0.03	Female	41	Japanese black	416.5
159	Oita	A	2016.03.13	-0.1	Female	108	F1	487
160	Kagoshima	A	2016.03.13	0.04	Female	102	Japanese black	414.5
161	Miyazaki	A	2016.03.13	0.04	Female	120	Japanese black	320
162	Miyazaki	A	2016.03.13	0.05	Female	117	Japanese black	339
163	Kagoshima	A	2016.03.13	-0.04	Female	156	Japanese black	261.5
164	Miyazaki	A	2016.03.13	-0.06	Female	140	Japanese black	320.5
165	Miyazaki	A	2016.03.14	0.03	Female	36	Japanese black	382
166	Kumamoto	A	2016.03.14	5.38	Female	98	Japanese black	341.5
167	Miyazaki	A	2016.03.14	0.01	Female	86	Japanese black	404
168	Miyazaki	A	2016.03.14	0.05	Female	130	Japanese black	368
169	Miyazaki	A	2016.03.14	0.31	Female	158	Japanese black	293
170	Kagoshima	A	2016.03.14	0.01	Female	216	Japanese black	280
171	Kagoshima	A	2016.03.14	-0.03	Female	161	Japanese black	301.5
172	Kagoshima	A	2016.03.14	-0.07	Female	167	Japanese black	321.5
173	Kagoshima	A	2016.03.14	5.18	Female	132	Japanese black	321
174	Miyazaki	A	2016.03.14	0.01	Female	164	Japanese black	352.5
175	Miyazaki	A	2016.03.17	0.05	Female	118	Japanese black	303
176	Kagoshima	A	2016.03.17	0.02	Female	156	Japanese black	329
177	Miyazaki	A	2016.03.21	0.04	Female	29	Japanese black	428
178	Miyazaki	A	2016.03.21	0.06	Female	30	Japanese black	424.5
179	Miyazaki	A	2016.03.21	0.2	Female	80	Japanese black	378
180	Miyazaki	A	2016.03.21	5.2	Female	144	Japanese black	311.5
181	Kagoshima	A	2016.03.21	0.03	Female	109	Japanese black	367
182	Nagasaki	A	2016.03.21	0.03	Female	178	Japanese black	354.5
183	Kagoshima	A	2016.03.21	0	Female	201	Japanese black	259.5
184	Okinawa	A	2016.03.21	0.16	Female	238	Japanese black	243
185	Miyazaki	A	2016.03.21	0.26	Female	165	Japanese black	380.5
186	Miyazaki	A	2016.03.22	0.15	Female	38	Japanese black	No Info.
187	Kumamoto	A	2016.03.24	4.76	Female	40	Holstein	214.5
188	Kagoshima	A	2016.03.24	0.12	Female	91	Holstein	278.5
189	Kagoshima	A	2016.03.27	0.15	Female	68	Japanese black	461.5
190	Kagoshima	A	2016.03.27	0.25	Female	145	Japanese black	306
191	Kagoshima	A	2016.03.27	0.17	Female	163	Japanese black	303
192	Kumamoto	A	2016.03.27	0.17	Female	119	Japanese black	386
193	Miyazaki	A	2016.03.27	0.03	Female	106	Japanese black	359
194	Nagasaki	A	2016.03.27	0.17	Female	146	Japanese black	352
195	Kagoshima	A	2016.03.29	-0.01	Female	72	Japanese black	No Info.
196	Okinawa	A	2016.03.29	3.71	Female	171	Japanese black	No Info.
197	Okinawa	A	2016.03.29	0.03	Female	195	Japanese black	No Info.
198	Okinawa	A	2016.03.29	3.21	Female	186	Japanese black	No Info.
199	Miyazaki	A	2016.03.28	2.57	Female	157	Japanese black	366.5
200	Miyazaki	A	2016.03.28	0.02	Female	103	Japanese black	413.5
201	Kagoshima	A	2016.03.28	0.04	Female	147	Japanese black	312.5
202	Kagoshima	A	2016.03.28	0.02	Female	165	Japanese black	290.5
203	Kagoshima	A	2016.03.28	0.03	Female	134	Japanese black	299.5
204	Miyazaki	A	2016.03.28	0.02	Female	117	Japanese black	267
205	Miyazaki	A	2016.05.09	0.16	Female	44	Japanese black	No Info.
206	Kagoshima	A	2016.05.09	0.06	Female	70	Japanese black	No Info.
207	Miyazaki	A	2016.05.08	0.08	Female	139	Japanese black	358.5
208	Miyazaki	A	2016.05.09	0.08	Female	97	Japanese black	332.5
209	Aomori	A	2016.05.09	6.39	Female	97	Japanese black	409.5
210	Miyazaki	A	2016.05.09	5.92	Female	195	Japanese black	311.5
211	Kagoshima	A	2016.05.09	0.08	Female	232	Japanese black	268.5
212	Miyazaki	A	2016.05.09	6.24	Female	231	Japanese black	345
213	Kumamoto	A	2016.05.09	0.19	Female	216	Japanese black	339.5
214	Miyazaki	A	2016.05.09	0.09	Female	134	Japanese black	342
215	Miyazaki	A	2016.05.09	0.09	Female	154	Japanese black	365
216	Miyazaki	A	2016.05.15	0.08	Female	93	Japanese black	416.5
217	Miyazaki	A	2016.05.15	0.08	Female	160	Japanese black	389.5
218	Miyazaki	A	2016.05.15	0.1	Female	148	Japanese black	315
219	Miyazaki	A	2016.05.15	0.21	Female	167	Japanese black	345
220	Miyazaki	A	2016.05.15	0.06	Female	227	Japanese black	357.5
221	Miyazaki	A	2016.05.15	0.07	Female	190	Japanese black	344.5
222	Kumamoto	A	2016.05.15	6.31	Female	185	Japanese black	288.5
223	Aomori	A	2016.05.17	0.15	Female	76	Japanese black	No Info.
224	Aomori	A	2016.05.16	6.59	Female	106	Japanese black	375.5
225	Kagoshima	A	2016.05.16	0.09	Female	200	Japanese black	303.5
226	Kagoshima	A	2016.05.16	6.35	Female	148	Japanese black	331
227	Miyazaki	A	2016.05.16	0.03	Female	141	Japanese black	332
228	Kagoshima	A	2016.05.16	0.16	Female	158	Japanese black	316.5
229	Miyazaki	A	2016.05.16	0.08	Female	153	Japanese black	425.5
230	Hokkaido	A	2016.05.17	-0.06	Male	25	F1	576
231	Hokkaido	A	2016.05.17	0.04	Male	26	F1	486.5
232	Hokkaido	A	2016.05.17	3.23	Male	27	F1	596.5
233	Shimane	A	2016.05.17	0.01	Female	88	Japanese black	349
234	Shimane	A	2016.05.17	0.02	Female	101	Japanese black	293
235	Miyazaki	A	2016.05.22	0.01	Female	80	Japanese black	440
236	Miyazaki	A	2016.05.22	0.02	Female	128	Japanese black	325
237	Kagoshima	A	2016.05.22	0.1	Female	126	Japanese black	334.5
238	Miyazaki	A	2016.05.23	0.04	Female	29	Japanese black	464
239	Miyazaki	A	2016.05.23	0.06	Female	30	Japanese black	448
240	Kumamoto	A	2016.05.24	0.03	Female	76	Japanese black	No Info.
241	Miyazaki	A	2016.05.23	0.07	Female	94	Japanese black	385.5
242	Miyazaki	A	2016.05.23	0.03	Female	110	Japanese black	324.5
243	Miyazaki	A	2016.05.23	0	Female	199	Japanese black	313
244	Kagoshima	A	2016.05.23	-0.01	Female	129	Japanese black	327.5
245	Kagoshima	A	2016.05.23	0.01	Female	136	Japanese black	330.5
246	Okinawa	A	2016.05.23	0.05	Female	199	Japanese black	263.5
247	Miyazaki	A	2016.05.23	0.08	Female	130	Japanese black	420.5
248	Miyazaki	A	2016.05.23	3.13	Female	164	Japanese black	363.5
249	Kagoshima	A	2016.05.23	3.2	Female	148	Japanese black	271.5
250	Kagoshima	A	2016.05.29	0.1	Female	33	Japanese black	467
251	Kagoshima	A	2016.05.29	3.12	Female	33	Japanese black	520
252	Kagoshima	A	2016.05.29	0.06	Female	81	Japanese black	405
253	Miyazaki	A	2016.05.29	0.03	Female	134	Japanese black	363.5
254	Miyazaki	A	2016.05.29	0.04	Female	172	Japanese black	272.5
255	Miyazaki	A	2016.05.29	0.02	Female	179	Japanese black	309.5
256	Hiroshima	A	2016.05.29	0.07	Female	189	Japanese black	244.5
257	Miyazaki	A	2016.05.30	0.11	Female	99	Japanese black	359.5
258	Kumamoto	A	2016.05.30	0.03	Female	94	Japanese black	314.5
259	Kagoshima	A	2016.05.30	0.05	Female	182	Japanese black	301.5
260	Miyazaki	A	2016.05.30	0.09	Female	173	Japanese black	304.5
261	Kumamoto	A	2016.05.30	0.04	Female	184	Japanese black	312.5
262	Kagoshima	A	2016.05.30	0.14	Female	144	Japanese black	316.5
263	Miyazaki	A	2016.05.30	0.1	Female	187	Japanese black	301
264	Nagasaki	A	2016.05.30	2.79	Female	228	Japanese black	270
265	Kagoshima	A	2016.05.30	0.15	Female	185	Japanese black	257.5
266	Miyazaki	A	2016.05.30	0.03	Female	144	Japanese black	353.5
267	Kagoshima	A	2016.05.30	2.84	Female	106	Japanese black	348.5
268	Hokkaido	A	2016.05.30	2.89	Female	73	Holstein	275.5
269	Hokkaido	A	2016.05.31	2.95	Female	85	Holstein	231
270	Miyazaki	A	2016.06.01	0.01	Female	56	Japanese black	No Info.
271	Miyazaki	A	2016.06.01	0.19	Female	79	Japanese black	No Info.
272	Nagasaki	A	2016.06.05	2.94	Female	149	Japanese black	353.5
273	Miyazaki	A	2016.06.05	0.03	Female	159	Japanese black	315
274	Miyazaki	A	2016.06.05	-0.04	Female	163	Japanese black	302
275	Oita	A	2016.06.05	2.9	Female	167	Japanese black	321.5
276	Miyazaki	A	2016.06.05	-0.23	Female	80	Japanese black	513.5
277	Miyazaki	A	2016.06.06	1.73	Female	153	Japanese black	395.5
278	Miyazaki	A	2016.06.06	0.01	Female	95	Japanese black	350.5
279	Okayama	A	2016.06.06	0.1	Female	139	Japanese black	288
280	Miyazaki	A	2016.06.06	0.11	Female	154	Japanese black	281.5
281	Kagoshima	A	2016.06.06	0.22	Female	166	Japanese black	288.5
282	Kagoshima	A	2016.06.06	0.13	Female	179	Japanese black	310
283	Kagoshima	A	2016.06.12	0.03	Female	128	Japanese black	334
284	Miyazaki	A	2016.06.12	0.06	Female	158	Japanese black	289
285	Miyazaki	A	2016.06.12	0.04	Female	209	Japanese black	301
286	Kumamoto	A	2016.06.12	3.71	Female	192	Japanese black	396.5
287	Kagoshima	A	2016.06.14	0.02	Female	35	Japanese black	No Info.
288	Kumamoto	A	2016.06.13	0.04	Female	113	Japanese black	387
289	Kagoshima	A	2016.06.13	0.02	Female	109	Japanese black	388
290	Miyazaki	A	2016.06.13	3.58	Female	107	Japanese black	383.5
291	Miyazaki	A	2016.06.13	0.03	Female	151	Japanese black	293.5
292	Miyazaki	A	2016.06.13	0.06	Female	129	Japanese black	373
293	Miyazaki	A	2016.06.13	0.03	Female	119	Japanese black	348
294	Miyazaki	A	2016.06.13	0.04	Female	150	Japanese black	342.5
295	Miyazaki	A	2016.06.13	0.04	Female	201	Japanese black	304.5
296	Shimane	A	2016.06.13	0.04	Female	185	Japanese black	250.5
297	Miyazaki	A	2016.06.20	-0.01	Female	82	Japanese black	407
298	Miyazaki	A	2016.06.19	0.24	Female	147	Japanese black	439.5
299	Nagasaki	A	2016.06.19	0.08	Female	180	Japanese black	352.5
300	Kagoshima	A	2016.06.19	-0.03	Female	156	Japanese black	314
301	Kagoshima	A	2016.06.19	0.09	Female	152	Japanese black	312.5
302	Miyazaki	A	2016.06.19	1.48	Female	179	Japanese black	283
303	Miyazaki	A	2016.06.20	0	Male	30	Japanese black	479.5
304	Kagoshima	A	2016.06.20	0.08	Female	34	Japanese black	483
305	Aomori	A	2016.06.20	0.17	Female	97	Japanese black	336.5
306	Oita	A	2016.06.20	3.89	Female	100	Japanese black	408
307	Kumamoto	A	2016.06.20	0.03	Female	157	Japanese black	429.5
308	Miyazaki	A	2016.06.20	0.16	Female	178	Japanese black	355
309	Kagoshima	A	2016.06.20	3.47	Female	48	Holstein	201.5
310	Hokkaido	A	2016.06.21	0.1	Female	26	F1	466.5
311	Hokkaido	A	2016.06.21	0.22	Female	26	F1	531.5
312	Hokkaido	A	2016.06.21	0.1	Female	26	F1	424.5
313	Gifu	A	2016.06.21	0.05	Female	27	F1	445
314	Hokkaido	A	2016.06.21	2.59	Female	27	F1	404
315	Kagoshima	A	2016.06.26	0	Female	30	Japanese black	396
316	Kagoshima	A	2016.06.26	0.05	Female	180	Japanese black	382
317	Miyazaki	A	2016.06.26	0.01	Female	99	Japanese black	402
318	Nagasaki	A	2016.06.26	2.14	Female	219	Japanese black	310
319	Miyazaki	A	2016.06.28	2.28	Female	48	Japanese black	No Info.
320	Miyazaki	A	2016.06.27	1.75	Female	76	Japanese black	426
321	Kagoshima	A	2016.06.27	2.37	Female	101	Japanese black	329.5
322	Nagasaki	A	2016.06.27	0.02	Female	102	Japanese black	329
323	Kagoshima	A	2016.06.27	0.04	Female	158	Japanese black	289.5
324	Kagoshima	A	2016.06.27	0.06	Female	162	Japanese black	288
325	Miyazaki	B	2016.08.23	0.03	Male	29	Japanese black	460.8
326	Miyazaki	B	2016.08.23	2.35	Male	28	Japanese black	405.5
327	Miyazaki	B	2016.08.23	2.34	Male	28	Japanese black	484.6
328	Miyazaki	B	2016.08.23	0.02	Male	28	Japanese black	425.9
329	Miyazaki	B	2016.08.23	0.03	Male	27	Japanese black	604.8
330	Miyazaki	B	2016.08.23	0.02	Male	28	Japanese black	429.3
331	Miyazaki	B	2016.08.23	0.02	Male	26	Japanese black	482.6
332	Miyazaki	B	2016.08.23	0.03	Male	28	Japanese black	481.7
333	Miyazaki	B	2016.08.23	0	Male	28	Japanese black	544.7
334	Miyazaki	B	2016.08.23	2.11	Male	27	Japanese black	504
335	Miyazaki	B	2016.08.23	2.35	Male	27	Japanese black	475.3
336	Miyazaki	B	2016.08.23	0	Male	27	Japanese black	546.6
337	Miyazaki	B	2016.08.23	0.02	Male	27	Japanese black	514.6
338	Miyazaki	B	2016.08.23	0.04	Male	28	Japanese black	495.7
339	Miyazaki	B	2016.08.23	0.05	Male	27	Japanese black	462.7
340	Miyazaki	B	2016.08.23	0.02	Male	26	Japanese black	504.4
341	Miyazaki	B	2016.08.23	2.11	Male	28	Japanese black	531.6
342	Miyazaki	B	2016.08.23	0.01	Male	26	Japanese black	602.9
343	Miyazaki	B	2016.08.23	0.01	Female	28	Japanese black	450.6
344	Miyazaki	B	2016.08.23	0.02	Female	28	Japanese black	390
345	Miyazaki	B	2016.08.23	0.06	Female	28	Japanese black	426.8
346	Miyazaki	B	2016.08.23	0.05	Female	29	Japanese black	425.4
347	Miyazaki	B	2016.08.23	0.05	Male	29	Japanese black	471
348	Miyazaki	B	2016.08.23	0	Male	28	Japanese black	470
349	Miyazaki	B	2016.08.23	0.12	Female	28	Japanese black	407.9
350	Miyazaki	B	2016.08.23	0.04	Female	28	Japanese black	401.1
351	Miyazaki	B	2016.08.24	0.03	Male	27	Japanese black	388
352	Miyazaki	B	2016.08.23	0.02	Male	32	Japanese black	463.7
353	Miyazaki	B	2016.08.23	0.05	Male	32	Japanese black	434.1
354	Miyazaki	B	2016.08.23	0.86	Male	31	Japanese black	510.3
355	Miyazaki	B	2016.08.23	0.06	Male	31	Japanese black	433.2
356	Miyazaki	B	2016.08.23	2.4	Male	31	Japanese black	463.7
357	Miyazaki	B	2016.08.23	2.38	Male	31	Japanese black	535.5
358	Miyazaki	B	2016.08.23	0.05	Male	32	Japanese black	523.4
359	Miyazaki	B	2016.08.23	2.33	Male	31	Japanese black	498.1
360	Miyazaki	B	2016.08.23	0.02	Male	32	Japanese black	503
361	Miyazaki	B	2016.08.23	0.03	Male	31	Japanese black	424.4
362	Miyazaki	B	2016.08.23	0.11	Male	32	Japanese black	507.8
363	Miyazaki	B	2016.08.23	0.01	Male	32	Japanese black	491.8
364	Miyazaki	B	2016.08.23	0	Male	33	Japanese black	485.5
365	Miyazaki	B	2016.08.23	-0.01	Male	31	Japanese black	485.5
366	Miyazaki	B	2016.08.23	0.03	Male	29	Japanese black	483.6
367	Miyazaki	B	2016.08.23	0.06	Male	29	Japanese black	508.3
368	Miyazaki	B	2016.08.23	-0.02	Male	30	Japanese black	509.3
369	Miyazaki	B	2016.08.23	0.02	Male	30	Japanese black	422.5
370	Miyazaki	B	2016.08.23	0.02	Female	29	Japanese black	490.9
371	Miyazaki	B	2016.08.23	0.02	Male	31	Japanese black	458.4
372	Miyazaki	B	2016.08.23	0.01	Male	30	Japanese black	489.9
373	Miyazaki	B	2016.08.23	0.03	Male	34	Japanese black	459.8
374	Miyazaki	B	2016.08.23	0.1	Male	34	Japanese black	488
375	Miyazaki	B	2016.08.23	0.07	Female	160	Japanese black	389
376	Miyazaki	B	2016.08.23	0.03	Female	142	Japanese black	354.6
377	Miyazaki	B	2016.08.23	0.02	Female	137	Japanese black	311.9
378	Miyazaki	B	2016.08.23	0.08	Female	144	Japanese black	380.8
379	Miyazaki	B	2016.08.23	0.04	Female	130	Japanese black	387.6
380	Miyazaki	B	2016.08.23	2.73	Female	111	Japanese black	457.9
381	Nagasaki	B	2016.08.23	0.02	Female	159	Japanese black	363.8
382	Miyazaki	B	2016.08.23	0.03	Female	156	Japanese black	370.1
383	Kumamoto	B	2016.08.24	0	Male	27	Japanese black	551.5
384	Kumamoto	B	2016.08.24	0.01	Male	26	Japanese black	483.6
385	Kumamoto	B	2016.08.24	0.03	Male	26	Japanese black	444.8
386	Saga	B	2016.08.24	0.12	Male	25	Japanese black	469.5
387	Saga	B	2016.08.24	0.04	Male	25	Japanese black	491.8
388	Saga	B	2016.08.24	0.02	Male	26	Japanese black	510.8
389	Fukuoka	B	2016.08.24	0.02	Male	26	Japanese black	512.2
390	Kumamoto	B	2016.08.24	2.55	Male	26	Japanese black	531.6
391	Kumamoto	B	2016.08.24	0.04	Male	26	Japanese black	516.6
392	Oita	B	2016.08.24	0.02	Male	25	Japanese black	392.4
393	Kagoshima	B	2016.08.24	2.61	Male	25	Japanese black	441.9
394	Oita	B	2016.08.24	0.09	Female	26	Japanese black	562.6
395	Oita	B	2016.08.24	-0.01	Female	26	Japanese black	472.4
396	Kagoshima	B	2016.08.24	2.72	Male	29	Japanese black	421
397	Kagoshima	B	2016.08.24	2.73	Male	28	Japanese black	378.3
398	Miyazaki	B	2016.08.24	0.02	Male	28	Japanese black	453
399	Miyazaki	B	2016.08.24	0.06	Female	28	Japanese black	406.5
400	Miyazaki	B	2016.08.24	0.04	Female	28	Japanese black	406.5
401	Miyazaki	B	2016.08.24	0.03	Female	28	Japanese black	453.5
402	Miyazaki	B	2016.08.24	0.05	Male	29	Japanese black	413.3
403	Miyazaki	B	2016.08.24	0.07	Female	26	Japanese black	330.8
404	Miyazaki	B	2016.08.24	0.04	Female	29	Japanese black	516.1
405	Miyazaki	B	2016.08.24	0.04	Female	27	Japanese black	400.2
406	Miyazaki	B	2016.08.24	0.03	Female	28	Japanese black	367.7
407	Miyazaki	B	2016.08.24	0.04	Female	27	Japanese black	426.4
408	Miyazaki	B	2016.08.24	2.65	Female	28	Japanese black	377.4
409	Kagoshima	B	2016.08.24	1.31	Male	27	Japanese black	408.4
410	Miyazaki	B	2016.08.24	0	Female	26	Japanese black	310
411	Miyazaki	B	2016.08.24	0	Female	28	Japanese black	379.8
412	Miyazaki	B	2016.08.24	0.35	Female	28	Japanese black	399.7
413	Miyazaki	B	2016.08.24	0.05	Male	25	Japanese black	491.4
414	Miyazaki	B	2016.08.24	0.15	Male	27	Japanese black	501.1
415	Miyazaki	B	2016.08.24	0.02	Male	28	Japanese black	519.5
416	Miyazaki	B	2016.08.24	0.04	Male	28	Japanese black	477.8
417	Miyazaki	B	2016.08.24	0.02	Male	27	Japanese black	451.6
418	Miyazaki	B	2016.08.24	0.05	Female	27	Japanese black	447.7
419	Miyazaki	B	2016.08.24	0.04	Male	28	Japanese black	390.5
420	Miyazaki	B	2016.08.24	0.03	Male	28	Japanese black	467.1
421	Miyazaki	B	2016.08.24	0.14	Male	30	Japanese black	477.3
422	Miyazaki	B	2016.08.24	0.01	Male	30	Japanese black	514.6
423	Miyazaki	B	2016.08.24	0.01	Male	30	Japanese black	493.3
424	Miyazaki	B	2016.08.24	0.02	Male	31	Japanese black	493.8
425	Miyazaki	B	2016.08.24	0.03	Male	30	Japanese black	488.9
426	Miyazaki	B	2016.08.24	0.01	Male	30	Japanese black	510.8
427	Miyazaki	B	2016.08.24	0.01	Male	30	Japanese black	439.9
428	Miyazaki	B	2016.08.24	-0.03	Male	29	Japanese black	502.5
429	Miyazaki	B	2016.08.24	1.31	Male	29	Japanese black	436.1
430	Kagoshima	B	2016.08.24	1.34	Male	30	Japanese black	425.4
431	Miyazaki	B	2016.08.24	0.02	Male	36	Japanese black	414.2
432	Miyazaki	B	2016.08.24	0.02	Male	30	Japanese black	446.7
433	Miyazaki	B	2016.08.24	0.02	Male	30	Japanese black	471.5
434	Miyazaki	B	2016.08.24	0.01	Female	29	Japanese black	395.8
435	Miyazaki	B	2016.08.24	0.04	Female	32	Japanese black	500.1
436	Miyazaki	B	2016.08.24	0.02	Female	32	Japanese black	437
437	Miyazaki	B	2016.08.24	0.02	Male	30	Japanese black	498.1
438	Miyazaki	B	2016.08.24	0.04	Male	31	Japanese black	412.8
439	Miyazaki	B	2016.08.24	0.03	Male	30	Japanese black	439.9
440	Kagoshima	B	2016.08.24	1.35	Male	29	Japanese black	400.7
441	Miyazaki	B	2016.08.24	1.34	Female	29	Japanese black	403.1
442	Miyazaki	B	2016.08.24	1.36	Female	155	Japanese black	400.7
443	Hokkaido	B	2016.08.25	0.01	Female	15	F1	285.7
444	Miyazaki	B	2016.08.28	0	Male	27	Japanese black	503.5
445	Miyazaki	B	2016.08.28	0.02	Male	27	Japanese black	456.9
446	Miyazaki	B	2016.08.28	0.05	Male	27	Japanese black	475.3
447	Miyazaki	B	2016.08.28	0.02	Male	27	Japanese black	512.2
448	Miyazaki	B	2016.08.28	1.31	Male	27	Japanese black	456.9
449	Miyazaki	B	2016.08.28	1.31	Male	27	Japanese black	446.2
450	Miyazaki	B	2016.08.28	0.03	Male	27	Japanese black	433.6
451	Miyazaki	B	2016.08.28	0.15	Male	27	Japanese black	467.1
452	Miyazaki	B	2016.08.28	0.05	Female	29	Japanese black	362.8
453	Miyazaki	B	2016.08.28	0.03	Female	28	Japanese black	366.7
454	Miyazaki	B	2016.08.28	0.07	Female	28	Japanese black	439.9
455	Miyazaki	B	2016.08.28	0.02	Male	28	Japanese black	542.8
456	Okinawa	B	2016.08.28	0	Male	29	Japanese black	464.7
457	Okinawa	B	2016.08.28	1.44	Male	27	Japanese black	512.2
458	Okinawa	B	2016.08.28	0.03	Male	28	Japanese black	487
459	Okinawa	B	2016.08.28	0.05	Male	28	Japanese black	500.6
460	Okinawa	B	2016.08.28	1.5	Male	28	Japanese black	447.2
461	Miyazaki	B	2016.08.28	0.03	Male	28	Japanese black	535.5
462	Miyazaki	B	2016.08.28	0.04	Male	28	Japanese black	475.8
463	Okinawa	B	2016.08.28	1.49	Male	28	Japanese black	509.3
464	Okinawa	B	2016.08.28	1.53	Male	28	Japanese black	515.6
465	Miyazaki	B	2016.08.28	0.07	Male	28	Japanese black	444.3
466	Miyazaki	B	2016.08.28	0.02	Male	28	Japanese black	474.4
467	Miyazaki	B	2016.08.28	0.04	Male	28	Japanese black	459.8
468	Miyazaki	B	2016.08.28	0.03	Male	27	Japanese black	482.1
469	Miyazaki	B	2016.08.28	0.04	Male	26	Japanese black	461.8
470	Miyazaki	B	2016.08.28	0.07	Male	26	Japanese black	533.5
471	Miyazaki	B	2016.08.28	0.05	Male	27	Japanese black	435.6
472	Miyazaki	B	2016.08.28	1.5	Male	27	Japanese black	451.6
473	Miyazaki	B	2016.08.28	1.53	Male	27	Japanese black	420.1
474	Miyazaki	B	2016.08.28	0.02	Male	27	Japanese black	533.5
475	Miyazaki	B	2016.08.28	1.5	Male	27	Japanese black	441.9
476	Miyazaki	B	2016.08.28	0.09	Male	27	Japanese black	514.1
477	Miyazaki	B	2016.08.28	0.05	Male	28	Japanese black	527.7
478	Miyazaki	B	2016.08.28	0.07	Male	28	Japanese black	445.3
479	Miyazaki	B	2016.08.28	1.46	Male	28	Japanese black	518.5
480	Miyazaki	B	2016.08.28	1.49	Male	29	Japanese black	451.6
481	Miyazaki	B	2016.08.28	0.03	Male	28	Japanese black	470.5
482	Miyazaki	B	2016.08.28	0.03	Female	28	Japanese black	458.4
483	Miyazaki	B	2016.08.28	1.48	Female	27	Japanese black	476.3
484	Miyazaki	B	2016.08.28	0.08	Female	28	Japanese black	403.1
485	Miyazaki	B	2016.08.28	0.06	Male	28	Japanese black	360.9
486	Miyazaki	B	2016.08.28	-0.06	Female	28	Japanese black	425.9
487	Miyazaki	B	2016.08.28	0.02	Female	28	Japanese black	409.9
488	Miyazaki	B	2016.08.28	0.04	Male	27	Japanese black	446.7
489	Miyazaki	B	2016.08.28	1.46	Female	29	Japanese black	481.7
490	Miyazaki	B	2016.08.28	0.02	Male	32	Japanese black	485
491	Miyazaki	B	2016.08.28	0.04	Male	32	Japanese black	499.6
492	Miyazaki	B	2016.08.28	-0.06	Male	31	Japanese black	383.7
493	Miyazaki	B	2016.08.28	0.04	Female	30	Japanese black	385.6
494	Miyazaki	B	2016.08.28	1.27	Male	29	Japanese black	443.3
495	Miyazaki	B	2016.08.28	0.05	Female	129	Japanese black	360.4
496	Kagoshima	B	2016.08.28	0.06	Female	173	Japanese black	No Info.
497	Miyazaki	B	2016.08.29	1.23	Male	25	Japanese black	433.2
498	Miyazaki	B	2016.08.29	0.02	Female	103	Japanese black	271.2
499	Hokkaido	B	2016.08.29	0.11	Female	27	Japanese black	365.3
500	Hokkaido	B	2016.08.29	0.12	Female	27	Japanese black	368.2
501	Hokkaido	B	2016.08.29	0.05	Female	28	Japanese black	423.9
502	Hokkaido	B	2016.08.29	0.11	Female	27	Japanese black	431.2
503	Miyazaki	B	2016.08.29	0.17	Male	28	Japanese black	518
504	Miyazaki	B	2016.08.29	0.2	Male	28	Japanese black	494.7
505	Miyazaki	B	2016.08.29	0.02	Male	27	Japanese black	465.6
506	Miyazaki	B	2016.08.29	0.02	Female	24	Japanese black	452.6
507	Miyazaki	B	2016.08.29	0	Male	26	Japanese black	503.5
508	Miyazaki	B	2016.08.29	0.01	Male	27	Japanese black	440.9
509	Miyazaki	B	2016.08.29	0.01	Male	27	Japanese black	504.4
510	Miyazaki	B	2016.08.29	0.04	Male	28	Japanese black	500.1
511	Miyazaki	B	2016.08.29	0.02	Male	29	Japanese black	470
512	Miyazaki	B	2016.08.29	1.31	Male	28	Japanese black	468.6
513	Kagoshima	B	2016.08.29	0.03	Female	27	Japanese black	405.5
514	Kagoshima	B	2016.08.29	0.03	Female	27	Japanese black	446.2
515	Kagoshima	B	2016.08.29	1.31	Female	26	Japanese black	423
516	Kagoshima	B	2016.08.29	0.03	Female	28	Japanese black	358
517	Kagoshima	B	2016.08.29	0.06	Female	26	Japanese black	457.4
518	Kagoshima	B	2016.08.29	0.03	Female	25	Japanese black	416.7
519	Miyazaki	B	2016.08.29	0.02	Female	26	Japanese black	363.8
520	Miyazaki	B	2016.08.29	0.05	Female	28	Japanese black	453
521	Miyazaki	B	2016.08.29	-0.04	Female	28	Japanese black	405.5
522	Miyazaki	B	2016.08.29	1.3	Male	28	Japanese black	486.5
523	Miyazaki	B	2016.08.29	0.02	Male	29	Japanese black	461.8
524	Miyazaki	B	2016.08.29	1.3	Male	29	Japanese black	446.2
525	Kumamoto	B	2016.08.29	0.01	Female	31	Japanese black	414.2
526	Miyazaki	B	2016.08.29	0.02	Female	31	Japanese black	363.8
527	Miyazaki	B	2016.08.29	0.02	Male	30	Japanese black	439.9
528	Miyazaki	B	2016.08.29	0.26	Male	30	Japanese black	425.9
529	Miyazaki	B	2016.08.29	0.01	Male	30	Japanese black	426.4
530	Miyazaki	B	2016.08.29	1.26	Male	31	Japanese black	502.5
531	Miyazaki	B	2016.08.29	1.2	Male	29	Japanese black	369.1
532	Miyazaki	B	2016.08.29	1.29	Male	30	Japanese black	574.3
533	Miyazaki	B	2016.08.29	0.19	Male	30	Japanese black	495.7
534	Miyazaki	B	2016.08.29	1.29	Male	32	Japanese black	447.7
535	Miyazaki	B	2016.08.29	0	Male	32	Japanese black	520.9
536	Miyazaki	B	2016.08.29	0.03	Male	35	Japanese black	504
537	Miyazaki	B	2016.08.29	0.02	Male	33	Japanese black	506.4
538	Miyazaki	B	2016.08.29	0.02	Male	32	Japanese black	479.7
539	Miyazaki	B	2016.08.29	0.02	Female	30	Japanese black	409.4
540	Miyazaki	B	2016.08.29	0.02	Female	30	Japanese black	350.2
541	Miyazaki	B	2016.08.29	0	Female	32	Japanese black	359.4
542	Miyazaki	B	2016.08.29	0.02	Female	143	Japanese black	333.2
543	Miyazaki	B	2016.08.29	0.03	Female	83	Japanese black	404.1
544	Miyazaki	B	2016.08.29	0.01	Female	144	Japanese black	329.4
545	Miyazaki	B	2016.08.29	0.01	Female	140	Japanese black	355.1
546	Miyazaki	B	2016.08.29	0.03	Female	82	Japanese black	415.7
547	Miyazaki	B	2016.08.29	1.49	Female	80	Japanese black	389.5
548	Miyazaki	B	2016.08.29	1.47	Female	111	Japanese black	332.3
549	Miyazaki	B	2016.08.30	1.4	Male	28	Japanese black	435.6
550	Miyazaki	B	2016.08.30	0.02	Male	27	Japanese black	355.6
551	Miyazaki	B	2016.08.30	0.04	Male	26	Japanese black	468.1
552	Miyazaki	B	2016.08.30	1.46	Female	27	Japanese black	414.2
553	Kagoshima	B	2016.08.30	0.02	Male	28	Japanese black	473.4
554	Miyazaki	B	2016.08.30	0.02	Male	28	Japanese black	470
555	Miyazaki	B	2016.08.30	0.02	Male	27	Japanese black	491.8
556	Miyazaki	B	2016.08.30	0.01	Male	29	Japanese black	398.2
557	Miyazaki	B	2016.08.30	0.02	Male	26	Japanese black	542.8
558	Miyazaki	B	2016.08.30	1.46	Male	26	Japanese black	498.6
559	Miyazaki	B	2016.08.30	1.47	Male	28	Japanese black	478.7
560	Miyazaki	B	2016.08.30	1.44	Male	27	Japanese black	433.6
561	Miyazaki	B	2016.08.30	0.02	Male	29	Japanese black	461.8
562	Miyazaki	B	2016.08.30	1.51	Male	28	Japanese black	480.2
563	Miyazaki	B	2016.08.30	1.49	Female	29	Japanese black	462.7
564	Miyazaki	B	2016.08.30	0.01	Male	28	Japanese black	486
565	Miyazaki	B	2016.08.30	0.01	Male	29	Japanese black	474.9
566	Miyazaki	B	2016.08.30	0.03	Female	28	Japanese black	471
567	Miyazaki	B	2016.08.30	0.03	Female	28	Japanese black	422
568	Kagoshima	B	2016.08.30	1.43	Male	28	Japanese black	528.2
569	Miyazaki	B	2016.08.30	0.04	Male	27	Japanese black	438
570	Miyazaki	B	2016.08.30	0.04	Male	28	Japanese black	456.9
571	Miyazaki	B	2016.08.30	0.01	Male	29	Japanese black	442.4
572	Miyazaki	B	2016.08.30	0.01	Male	28	Japanese black	523.4
573	Miyazaki	B	2016.08.30	0.11	Female	29	Japanese black	380.3
574	Miyazaki	B	2016.08.30	0.07	Female	28	Japanese black	440.4
575	Miyazaki	B	2016.08.30	0.03	Female	28	Japanese black	486.5
576	Miyazaki	B	2016.08.30	0	Female	27	Japanese black	422
577	Miyazaki	B	2016.08.30	0.01	Female	27	Japanese black	530.2
578	Miyazaki	B	2016.08.30	0	Female	29	Japanese black	367.2
579	Miyazaki	B	2016.08.30	0.02	Male	33	Japanese black	479.7
580	Miyazaki	B	2016.08.30	0.03	Female	32	Japanese black	359.4
581	Miyazaki	B	2016.08.30	0.02	Male	30	Japanese black	418.6
582	Miyazaki	B	2016.08.30	0.03	Male	32	Japanese black	445.8
583	Kumamoto	B	2016.08.30	1.61	Male	34	Japanese black	501.1
584	Miyazaki	B	2016.08.30	0.02	Male	30	Japanese black	497.2
585	Miyazaki	B	2016.08.30	0.01	Male	29	Japanese black	429.3
586	Miyazaki	B	2016.08.30	1.58	Female	29	Japanese black	393.9
587	Miyazaki	B	2016.08.30	0.01	Female	30	Japanese black	429.3
588	Miyazaki	B	2016.08.30	0.02	Male	30	Japanese black	405.5
589	Kagoshima	B	2016.08.30	0.01	Male	30	Japanese black	405
590	Kagoshima	B	2016.08.30	0.03	Male	30	Japanese black	481.7
591	Kagoshima	B	2016.08.30	0.03	Male	29	Japanese black	437
592	Kagoshima	B	2016.08.30	0.03	Male	31	Japanese black	424.9
593	Kagoshima	B	2016.08.30	1.08	Male	31	Japanese black	467.1
594	Kagoshima	B	2016.08.30	0.21	Male	32	Japanese black	490.9
595	Kagoshima	B	2016.08.30	1.46	Male	31	Japanese black	500.6
596	Kagoshima	B	2016.08.30	0	Male	34	Japanese black	436.5
597	Miyazaki	B	2016.08.30	0	Female	83	Japanese black	476.8
598	Miyazaki	B	2016.08.30	1.6	Female	154	Japanese black	382.7
599	Miyazaki	B	2016.08.30	1.58	Female	132	Japanese black	347.8
600	Kumamoto	B	2016.08.31	1.55	Male	26	Japanese black	466.1
601	Kumamoto	B	2016.08.31	1.55	Male	26	Japanese black	504.9
602	Kumamoto	B	2016.08.31	1.51	Male	26	Japanese black	475.3
603	Oita	B	2016.08.31	1.53	Male	26	Japanese black	546.6
604	Kumamoto	B	2016.08.31	0.01	Male	26	Japanese black	468.6
605	Kumamoto	B	2016.08.31	0.01	Male	26	Japanese black	453.5
606	Fukuoka	B	2016.08.31	1.54	Male	26	Japanese black	437
607	Nagasaki	B	2016.08.31	-0.01	Female	26	Japanese black	472.9
608	Nagasaki	B	2016.08.31	1.55	Female	26	Japanese black	439.5
609	Miyazaki	B	2016.08.31	0.04	Male	28	Japanese black	487.5
610	Kagoshima	B	2016.08.31	1.62	Male	29	Japanese black	533.1
611	Kagoshima	B	2016.08.31	1.58	Male	27	Japanese black	472.9
612	Kagoshima	B	2016.08.31	1.56	Female	27	Japanese black	475.3
613	Miyazaki	B	2016.08.31	0.02	Female	29	Japanese black	405
614	Miyazaki	B	2016.08.31	1.61	Female	28	Japanese black	370.1
615	Miyazaki	B	2016.08.31	1.59	Male	28	Japanese black	501.5
616	Miyazaki	B	2016.08.31	0.03	Male	28	Japanese black	427.8
617	Miyazaki	B	2016.08.31	1.61	Male	29	Japanese black	461.8
618	Miyazaki	B	2016.08.31	0.02	Male	29	Japanese black	448.7
619	Miyazaki	B	2016.08.31	0.02	Male	30	Japanese black	No Info.
620	Miyazaki	B	2016.08.31	0.01	Male	30	Japanese black	477.3
621	Miyazaki	B	2016.08.31	0.02	Male	31	Japanese black	472
622	Miyazaki	B	2016.08.31	0.02	Male	30	Japanese black	427.8
623	Miyazaki	B	2016.08.31	0.01	Male	30	Japanese black	457.4
624	Miyazaki	B	2016.08.31	0.03	Male	32	Japanese black	437
625	Miyazaki	B	2016.08.31	0.01	Male	30	Japanese black	477.8
626	Miyazaki	B	2016.08.31	0.02	Male	29	Japanese black	447.2
627	Miyazaki	B	2016.08.31	0.04	Male	33	Japanese black	530.6
628	Miyazaki	B	2016.08.31	0.01	Male	33	Japanese black	516.6
629	Miyazaki	B	2016.08.31	0.02	Male	32	Japanese black	548.1
630	Miyazaki	B	2016.08.31	-0.01	Male	32	Japanese black	524.8
631	Miyazaki	B	2016.08.31	0.02	Male	30	Japanese black	403.1
632	Miyazaki	B	2016.08.31	1.6	Male	31	Japanese black	464.7
633	Miyazaki	B	2016.08.31	0.01	Male	31	Japanese black	551
634	Miyazaki	B	2016.08.31	0.01	Male	32	Japanese black	584.5
635	Miyazaki	B	2016.08.31	0.02	Male	31	Japanese black	528.7
636	Miyazaki	B	2016.08.31	0.02	Male	32	Japanese black	521.9
637	Miyazaki	B	2016.08.31	0.04	Male	29	Japanese black	431.7
638	Miyazaki	B	2016.08.31	0.01	Male	30	Japanese black	431.7
639	Kagoshima	B	2016.08.31	1.17	Female	29	Japanese black	481.2
640	Miyazaki	B	2016.08.31	0.02	Female	31	Japanese black	358.5
641	Miyazaki	B	2016.08.31	-0.01	Male	31	Japanese black	455
642	Miyazaki	B	2016.08.31	0.12	Male	30	Japanese black	374.5
643	Kumamoto	B	2016.08.31	1.61	Male	29	Japanese black	319.7
644	Miyazaki	B	2016.08.31	0.03	Female	36	Japanese black	518
645	Miyazaki	B	2016.08.31	0.02	Female	104	Japanese black	377.4
646	Miyazaki	B	2016.08.31	0.02	Female	195	Japanese black	324
647	Miyazaki	B	2016.08.31	0.02	Female	181	Japanese black	349.2
648	Miyazaki	B	2016.08.31	-0.03	Female	131	Japanese black	324
649	Miyazaki	B	2016.08.31	1.61	Female	138	Japanese black	347.3
650	Miyazaki	B	2016.08.31	0.01	Female	54	Japanese black	371.6
651	Miyazaki	B	2016.08.31	0	Female	194	Japanese black	316.8
652	Miyazaki	B	2016.08.31	0.03	Female	170	Japanese black	245.9
653	Kagoshima	B	2016.08.31	0.01	Female	211	Japanese black	253.2
654	Miyazaki	B	2016.09.01	-0.02	Female	103	Japanese black	432.2
655	Miyazaki	B	2016.09.01	1.56	Male	29	Japanese black	532.6
656	Miyazaki	B	2016.09.01	1.58	Male	29	Japanese black	508.3
657	Miyazaki	B	2016.09.01	0.02	Male	28	Japanese black	429.3
658	Miyazaki	B	2016.09.01	0.02	Female	28	Japanese black	455.5
659	Miyazaki	B	2016.09.01	1.61	Female	29	Japanese black	475.8
660	Miyazaki	B	2016.09.01	0.02	Male	24	Japanese black	508.8
661	Miyazaki	B	2016.09.01	0.02	Male	26	Japanese black	469.5
662	Miyazaki	B	2016.09.01	0.02	Male	27	Japanese black	509.8
663	Miyazaki	B	2016.09.01	0.01	Male	27	Japanese black	458.9
664	Miyazaki	B	2016.09.01	0.03	Male	26	Japanese black	465.6
665	Miyazaki	B	2016.09.01	0.03	Male	26	Japanese black	457.4
666	Miyazaki	B	2016.09.01	0.02	Male	27	Japanese black	519.5
667	Miyazaki	B	2016.09.01	0.01	Male	27	Japanese black	558.3
668	Miyazaki	B	2016.09.01	-0.02	Male	29	Japanese black	414.2
669	Miyazaki	B	2016.09.01	0.01	Male	27	Japanese black	419.1
670	Miyazaki	B	2016.09.01	0.01	Male	27	Japanese black	472
671	Miyazaki	B	2016.09.01	0.04	Male	28	Japanese black	502.5
672	Kagoshima	B	2016.09.01	1.83	Male	26	Japanese black	473.9
673	Miyazaki	B	2016.09.01	0	Female	29	Japanese black	426.8
674	Miyazaki	B	2016.09.01	-0.01	Female	28	Japanese black	420.5
675	Kagoshima	B	2016.09.01	1.05	Male	24	F1	402.1
676	Nagano	B	2016.09.01	-0.03	Female	24	F1	462.7
677	Nagasaki	B	2016.09.01	1.76	Female	22	F1	514.6
678	Nagano	B	2016.09.01	0.06	Female	23	F1	410.4
679	Saga	B	2016.09.01	0.1	Female	23	F1	480.7
680	Miyazaki	B	2016.09.01	0.04	Female	28	Japanese black	445.8
681	Miyazaki	B	2016.09.01	0.05	Female	28	Japanese black	440.9
682	Miyazaki	B	2016.09.01	-0.02	Female	28	Japanese black	347.8
683	Hokkaido	B	2016.09.01	0.01	Female	28	Japanese black	379.8
684	Hokkaido	B	2016.09.01	1.78	Male	28	F1	480.7
685	Miyazaki	B	2016.09.01	1.85	Male	24	F1	451.6
686	Miyazaki	B	2016.09.01	0.06	Male	26	Japanese black	499.1
687	Miyazaki	B	2016.09.01	0.03	Female	29	Japanese black	466.1
688	Miyazaki	B	2016.09.01	0.02	Male	27	Japanese black	412.3
689	Miyazaki	B	2016.09.01	0.01	Male	28	Japanese black	520.9
690	Nagasaki	B	2016.09.01	0	Male	29	Japanese black	518
691	Miyazaki	B	2016.09.01	0	Male	28	Japanese black	513.2
692	Miyazaki	B	2016.09.01	0.03	Female	28	Japanese black	418.1
693	Miyazaki	B	2016.09.01	0.03	Female	28	Japanese black	458.4
694	Miyazaki	B	2016.09.01	0.01	Male	29	Japanese black	503.5
695	Miyazaki	B	2016.09.01	0	Male	30	Japanese black	466.6
696	Miyazaki	B	2016.09.01	1.83	Male	30	Japanese black	520.5
697	Miyazaki	B	2016.09.01	0.01	Male	30	Japanese black	516.6
698	Kagoshima	B	2016.09.01	0.7	Male	28	Japanese black	616
699	Kagoshima	B	2016.09.01	0.01	Male	30	Japanese black	538.9
700	Miyazaki	B	2016.09.01	0.01	Male	28	Japanese black	498.6
701	Miyazaki	B	2016.09.01	0	Male	27	Japanese black	505.9
702	Miyazaki	B	2016.09.01	0.05	Female	29	Japanese black	467.1
703	Kagoshima	B	2016.09.01	-0.02	Male	31	Japanese black	429.3
704	Miyazaki	B	2016.09.01	0.06	Male	28	Japanese black	471
705	Miyazaki	B	2016.09.01	1.64	Male	29	Japanese black	441.9
706	Miyazaki	B	2016.09.01	1.72	Female	29	Japanese black	476.3
707	Miyazaki	B	2016.09.01	0.04	Male	29	Japanese black	513.2
708	Miyazaki	B	2016.09.01	0.01	Female	29	Japanese black	389
709	Miyazaki	B	2016.09.01	0.02	Female	29	Japanese black	439.5
710	Miyazaki	B	2016.09.01	0.04	Female	29	Japanese black	434.1
711	Miyazaki	B	2016.09.01	2.06	Female	30	Japanese black	419.6
712	Miyazaki	B	2016.09.01	0.04	Male	34	Japanese black	657.2
713	Miyazaki	B	2016.09.01	2.09	Female	123	Japanese black	324
714	Miyazaki	B	2016.09.01	2.07	Female	142	Japanese black	367.2
715	Miyazaki	B	2016.09.01	0.01	Female	135	Japanese black	320.6
716	Miyazaki	B	2016.09.01	0.07	Female	142	Japanese black	378.3
717	Kumamoto	B	2016.09.01	0.04	Female	159	Japanese black	264.9
718	Miyazaki	B	2016.09.04	0.11	Male	27	Japanese black	463.7
719	Miyazaki	B	2016.09.04	0.04	Male	27	Japanese black	463.2
720	Miyazaki	B	2016.09.04	2.04	Male	27	Japanese black	471.5
721	Miyazaki	B	2016.09.04	0.16	Male	27	Japanese black	450.6
722	Miyazaki	B	2016.09.04	0.13	Male	27	Japanese black	457.4
723	Miyazaki	B	2016.09.04	0.05	Male	27	Japanese black	532.6
724	Miyazaki	B	2016.09.04	0.08	Male	28	Japanese black	488
725	Miyazaki	B	2016.09.04	0.05	Male	27	Japanese black	418.6
726	Miyazaki	B	2016.09.04	-0.09	Male	27	Japanese black	487
727	Miyazaki	B	2016.09.04	0.01	Male	27	Japanese black	499.6
728	Miyazaki	B	2016.09.04	0.05	Male	29	Japanese black	478.3
729	Miyazaki	B	2016.09.04	2.13	Male	28	Japanese black	413.8
730	Miyazaki	B	2016.09.04	0.02	Male	28	Japanese black	461.8
731	Okinawa	B	2016.09.04	0.01	Male	28	Japanese black	457.4
732	Okinawa	B	2016.09.04	0.57	Male	28	Japanese black	420.5
733	Okinawa	B	2016.09.04	-0.02	Male	28	Japanese black	470.5
734	Miyazaki	B	2016.09.04	0.01	Male	28	Japanese black	529.2
735	Okinawa	B	2016.09.04	2.06	Male	28	Japanese black	497.7
736	Okinawa	B	2016.09.04	0	Male	28	Japanese black	487.5
737	Okinawa	B	2016.09.04	2.04	Male	28	Japanese black	543.7
738	Okinawa	B	2016.09.04	0	Female	27	Japanese black	424.9
739	Okinawa	B	2016.09.04	0.01	Male	26	Japanese black	475.8
740	Okinawa	B	2016.09.04	-0.01	Female	27	Japanese black	445.3
741	Okinawa	B	2016.09.04	0.01	Female	26	Japanese black	414.2
742	Okinawa	B	2016.09.04	0	Male	27	Japanese black	483.6
743	Okinawa	B	2016.09.04	0.01	Male	27	Japanese black	416.2
744	Okinawa	B	2016.09.04	0.01	Male	27	Japanese black	496.7
745	Okinawa	B	2016.09.04	2.09	Male	27	Japanese black	450.6
746	Miyazaki	B	2016.09.04	0.02	Male	28	Japanese black	522.4
747	Miyazaki	B	2016.09.04	0.01	Male	26	Japanese black	554.4
748	Miyazaki	B	2016.09.04	0.01	Male	27	Japanese black	407.4
749	Miyazaki	B	2016.09.04	0.03	Female	27	Japanese black	438
750	Miyazaki	B	2016.09.04	0.03	Female	28	Japanese black	474.4
751	Miyazaki	B	2016.09.04	0.13	Male	28	Japanese black	420.5
752	Miyazaki	B	2016.09.04	0.07	Male	26	Japanese black	500.1
753	Miyazaki	B	2016.09.04	0.13	Male	27	Japanese black	435.6
754	Miyazaki	B	2016.09.04	0.03	Male	27	Japanese black	526.3
755	Miyazaki	B	2016.09.04	0.02	Male	25	Japanese black	404.5
756	Miyazaki	B	2016.09.04	0.04	Male	25	Japanese black	519
757	Miyazaki	B	2016.09.04	0.02	Male	25	Japanese black	511.2
758	Miyazaki	B	2016.09.04	2.27	Male	27	Japanese black	375
759	Miyazaki	B	2016.09.04	0.13	Male	27	Japanese black	447.2
760	Miyazaki	B	2016.09.04	0.01	Male	28	Japanese black	582.5
761	Miyazaki	B	2016.09.04	0.03	Male	26	Japanese black	489.9
762	Miyazaki	B	2016.09.04	0.08	Female	27	Japanese black	461.3
763	Miyazaki	B	2016.09.04	0.05	Female	26	Japanese black	345.9
764	Miyazaki	B	2016.09.04	0.06	Female	27	Japanese black	360.4
765	Miyazaki	B	2016.09.05	0.41	Female	28	Japanese black	333.7
766	Miyazaki	B	2016.09.05	0.06	Female	27	Japanese black	364.3
767	Kagoshima	B	2016.09.04	2.28	Female	28	Japanese black	357.5
768	Kagoshima	B	2016.09.04	0.03	Female	28	Japanese black	429.3
769	Miyazaki	B	2016.09.04	-0.03	Male	27	Japanese black	450.6
770	Miyazaki	B	2016.09.04	0.07	Female	28	Japanese black	407.9
771	Miyazaki	B	2016.09.04	0.05	Female	31	Japanese black	474.4
772	Miyazaki	B	2016.09.04	0.02	Male	29	Japanese black	391.4
773	Kumamoto	B	2016.09.04	0	Male	30	Japanese black	442.9
774	Miyazaki	B	2016.09.04	2.09	Female	32	Holstein	485
775	Miyazaki	B	2016.09.04	0.18	Female	39	Japanese black	480.7
776	Kumamoto	B	2016.09.04	2.26	Female	40	Japanese black	408.9
777	Miyazaki	B	2016.09.04	0.08	Female	28	Japanese black	389.5
778	Kagoshima	B	2016.09.04	2.21	Female	109	Japanese black
779	Kagoshima	B	2016.09.04	0.03	Female	202	Japanese black	367.2
780	Miyazaki	B	2016.09.04	0.12	Female	76	Japanese black	388
781	Miyazaki	B	2016.09.04	0.03	Female	144	Japanese black	371.6
782	Miyazaki	B	2016.09.05	0.05	Male	28	Japanese black	570.4
783	Miyazaki	B	2016.09.05	2.16	Male	28	Japanese black	491.8
784	Hokkaido	B	2016.09.05	0.2	Female	27	Japanese black	466.6
785	Hokkaido	B	2016.09.05	0.19	Female	27	Japanese black	409.4
786	Hokkaido	B	2016.09.05	0.21	Female	27	Japanese black	406
787	Miyazaki	B	2016.09.05	0.08	Female	28	Japanese black	413.8
788	Miyazaki	B	2016.09.05	0.11	Female	27	Japanese black	400.2
789	Miyazaki	B	2016.09.05	0.08	Male	27	Japanese black	413.3
790	Miyazaki	B	2016.09.05	0.04	Male	27	Japanese black	449.2
791	Miyazaki	B	2016.09.05	0.13	Male	28	Japanese black	463.7
792	Miyazaki	B	2016.09.05	0.02	Male	29	Japanese black	488.4
793	Miyazaki	B	2016.09.05	0.01	Male	28	Japanese black	468.6
794	Miyazaki	B	2016.09.05	0.08	Male	28	Japanese black	452.1
795	Miyazaki	B	2016.09.05	-0.02	Male	29	Japanese black	526.3
796	Miyazaki	B	2016.09.05	0.17	Male	29	Japanese black	501.5
797	Nagasaki	B	2016.09.05	1.95	Female	28	Japanese black	376.9
798	Kumamoto	B	2016.09.05	0.05	Female	28	Japanese black	389.5
799	Miyazaki	B	2016.09.06	0.12	Male	28	Japanese black	488
800	Miyazaki	B	2016.09.05	2.09	Male	30	Japanese black	536.9
801	Miyazaki	B	2016.09.05	2.14	Male	32	Japanese black	546.6
802	Miyazaki	B	2016.09.05	0.07	Male	30	Japanese black	429.3
803	Miyazaki	B	2016.09.05	0.02	Male	29	Japanese black	516.6
804	Miyazaki	B	2016.09.05	0.07	Male	31	Japanese black	515.6
805	Miyazaki	B	2016.09.05	0.14	Male	29	Japanese black	536.9
806	Miyazaki	B	2016.09.05	0.09	Male	32	Japanese black	527.7
807	Miyazaki	B	2016.09.05	0.17	Male	33	Japanese black	492.3
808	Miyazaki	B	2016.09.05	1.81	Male	28	Japanese black	526.8
809	Miyazaki	B	2016.09.05	2.07	Male	28	Japanese black	535.5
810	Miyazaki	B	2016.09.05	0.07	Male	29	Japanese black	554.4
811	Miyazaki	B	2016.09.05	1.85	Male	28	Japanese black	540.8
812	Miyazaki	B	2016.09.05	-0.02	Male	28	Japanese black	470
813	Miyazaki	B	2016.09.05	2.09	Male	29	Japanese black	561.2
814	Miyazaki	B	2016.09.05	0.04	Male	29	Japanese black	509.3
815	Miyazaki	B	2016.09.05	0.02	Male	30	Japanese black	502.5
816	Miyazaki	B	2016.09.05	2.07	Male	31	Japanese black	571.4
817	Miyazaki	B	2016.09.05	0.05	Male	31	Japanese black	463.2
818	Miyazaki	B	2016.09.05	2.02	Male	32	Japanese black	475.3
819	Miyazaki	B	2016.09.05	2.1	Male	33	Japanese black	539.4
820	Miyazaki	B	2016.09.05	0.22	Male	30	Japanese black	420.5
821	Miyazaki	B	2016.09.05	0.09	Male	30	Japanese black	534
822	Miyazaki	B	2016.09.05	2.06	Male	31	Japanese black	504
823	Miyazaki	B	2016.09.05	2.05	Male	31	Japanese black	508.3
824	Kagoshima	B	2016.09.05	0.09	Male	29	Japanese black	415.2
825	Miyazaki	B	2016.09.05	0.1	Male	29	Japanese black	507.8
826	Kumamoto	B	2016.09.05	0.13	Male	32	Japanese black	403.6
827	Kagoshima	B	2016.09.05	0.16	Male	31	Japanese black	469.5
828	Miyazaki	B	2016.09.05	0	Female	29	Japanese black	399.2
829	Miyazaki	B	2016.09.05	0.25	Female	35	Japanese black	477.3
830	Miyazaki	B	2016.09.05	0.16	Male	29	Japanese black	535
831	Miyazaki	B	2016.09.05	0.09	Male	29	Japanese black	460.3
832	Okinawa	B	2016.09.05	2.14	Male	30	Japanese black	484.1
833	Okinawa	B	2016.09.05	1.95	Male	31	Japanese black	457.4
834	Kagoshima	B	2016.09.05	0.04	Female	30	Japanese black	465.2
835	Miyazaki	B	2016.09.05	0.02	Female	32	Japanese black	428.8
836	Miyazaki	B	2016.09.05	0.02	Female	41	Japanese black	416.7
837	Miyazaki	B	2016.09.05	0.03	Female	62	Japanese black	363.8
838	Miyazaki	B	2016.09.05	0.05	Female	252	Japanese black	223.6
839	Miyazaki	B	2016.09.05	0.15	Female	119	Japanese black	439
840	Miyazaki	B	2016.09.05	0.08	Female	162	Japanese black	336.6
841	Miyazaki	B	2016.09.05	0.03	Female	149	Japanese black	379.3
842	Miyazaki	B	2016.09.05	0.01	Female	154	Japanese black	371.6
843	Miyazaki	B	2016.09.05	0.08	Female	126	Japanese black	366.7
844	Hokkaido	B	2016.09.05	-0.01	Female	27	Japanese black	490.9
